# Supplementary material for: Oxygen reduction reaction activity of an iron phthalocyanine/graphene oxide nanocomposite
Source: Royal Society of Chemistry journal article supplement (doi:10.1039/d1ra01001h), 2021-01-01
Supplement: d1ra01001h1.pdf [file d1ra01001h1.pdf]

## Supplementary information

### Oxygen reduction reaction activity of an iron phthalocyanine/graphene oxide nanocomposite

Kenichiro Irida,<sup>a</sup> Kazuto Hatakeyama,<sup>\*b</sup> Soichiro Yoshimoto,<sup>b</sup> Michio Koinuma,<sup>\*b</sup> and Shintaro Ida<sup>\*b</sup>

- a. Graduate School of Science and Technology, Kumamoto University, 2-39-1 Kurokami, Chuo-ku, Kumamoto 860-8555, Japan.
- b. Institute of Industrial Nanomaterials (IINa), Kumamoto University, 2-39-1 Kurokami, Chuo-ku, Kumamoto 860-8555, Japan.

Corresponding author

ida-s@kumamoto-u.ac.jp

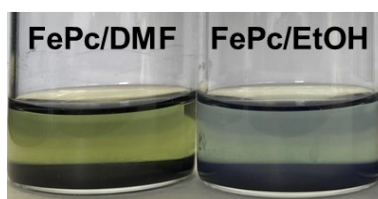

**Fig. S1** Photographs of an FePc/ MtOH, FePc/DMF and FePc/CHCl<sub>3</sub> dispersion after 1 day.

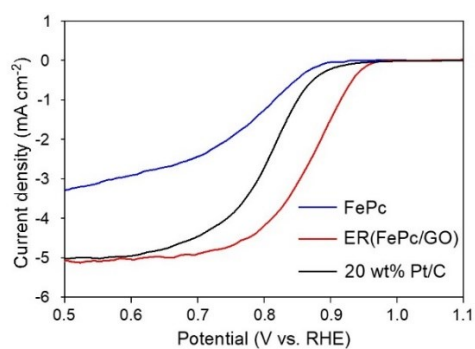

**Fig. S2** ORR polarization curves of FePc, ER(FePc/GO), and 20 wt% PtC in O<sub>2</sub>-saturated 0.1 M KOH.

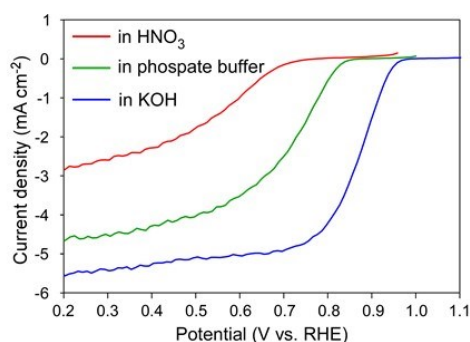

**Fig. S3** ORR polarization curves of ER(FePc/GO) in O<sub>2</sub>-saturated 0.1 M KOH, phosphate buffer and 0.1 M HNO<sub>3</sub>.

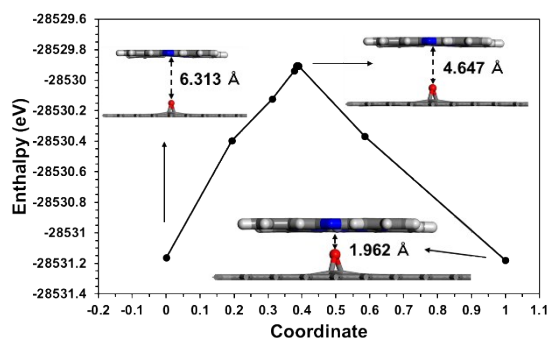

**Fig. S4** Optimization of the distance between the Fe atom in FePc and an O atom on a graphene framework.
